# Supplementary material for: Crabp2 Promotes Metastasis of Lung Cancer Cells via HuR and Integrin β1/FAK/ERK Signaling
Source: PubMed Central journal article supplement (PMC6351595; doi:10.1038/s41598-018-37443-4), 2019-01-29

## Supplementary Information

Crabp2 Promotes Metastasis of Lung Cancer Cells via HuR and Integrin  $\beta$ 1/FAK/ERK Signaling

Jun-I Wu<sup>1, 2, 6</sup>, Yi-Pei Lin<sup>1, 3, 6</sup>, Chien-Wei Tseng<sup>1, 4</sup>, Hui-Jane Chen<sup>1</sup> and Lu-Hai Wang<sup>1, 2, 3, 4, 5\*</sup>

<sup>1</sup>Institute of Molecular and Genomic Medicine, National Health Research Institutes, Miaoli County, Taiwan

<sup>2</sup>Department of Life Sciences, National Central University, Taoyuan, Taiwan

<sup>3</sup>Institute of Molecular and Cellular Biology, National Taiwan University, Taipei, Taiwan

<sup>4</sup>Graduate Institute of Integrated Medicine, China Medical University, Taichung, Taiwan

<sup>5</sup>Chinese Medical Research Center, China Medical University, Taichung, Taiwan

<sup>6</sup>These authors contributed equally to this work

\*Correspondence and requests for materials should be addressed to: Dr. Lu-Hai Wang, Graduate Institute of Integrated Medicine, China Medical University, Taichung, Taiwan. E-mail: [lu-hai.wang@nhri.org.tw](mailto:lu-hai.wang@nhri.org.tw) or [luhaiwang@mail.cmu.edu.tw](mailto:luhaiwang@mail.cmu.edu.tw). TEL: 886 4-2205 715; FAX: 886 4-2206 0248

## Supplementary Figure Legends

**Figure S1.** Knockdown of Crabp2 inhibited proliferation of C10F4 cells. C10F4 cells expressing control-shRNA (shCon) or Crabp2 shRNA (shCrabp2) were plated onto a 96-well plate at a density of 5,000 cells/well. Cell abundance was detected at 1-4 days by MTS assay. The  $p$  values were determined using Student's  $t$  test \* $p < 0.05$ , \*\*\* $p < 0.001$ .

**Figure S2.** The inhibitory effect of retinoic acid on anoikis resistance of C10F4 cells is independent of Crabp2. C10F4 cells expressing empty vector or Crabp2 were plated onto a 96-well anchorage-resistant plate at a density of 10,000 cells/well and treated with dimethyl sulfoxide (DMSO) or retinoic acid (RA, 1/10/50  $\mu\text{M}$ ). Twenty-four hours later, the viability of cells treated with RA versus DMSO was assessed by MTS assay. The  $p$  values were determined using two-way ANOVA.

**Figure S3.** Knockdown of HuR expression. Western blot analysis of HuR and  $\beta$ -actin (ACTB, as the loading control) in C10F4 cells expressing control-shRNA (shCon) or HuR-shRNA (shHuR).

**Figure S4.** C10F4 and H1650 cells are not sensitive to erlotinib. (a-b) C10F4 (a) or H1650 (b) cells were exposed to 10  $\mu\text{M}$  erlotinib. Cell viability at 48 hours was detected by MTS assay. The  $p$  values were calculated by Student's  $t$  test, and ns for  $p > 0.05$ .

**Figure S5.** CRABP2 is correlated with cell stress marker CHOP, E2F1, and E2F7. (a) Levels of CRABP2 and cell stress marker CHOP, E2F1, and E2F7 in tumors (T,

n=91) versus normal lungs (N, n=65) are shown using data from Hou lung, and the statistical significance was determined using Kruskal-Wallis test and Dunn's test as post test \*\* $p < 0.01$ , \*\*\* $p < 0.001$ . (b-c) Kaplan-Meier plot of the overall survival of 1926 lung cancer patients (b), or the first progression after surgery of 982 lung cancer patients (c) stratified by expression levels of CHOP using data from Kaplan-Meier Plotter database. The optimal cutoff was derived from Kaplan-Meier Plotter database, and patients with high levels of CHOP (CHOP<sup>High</sup>) exhibited higher risk than patients with low levels CHOP (CHOP<sup>Low</sup>). (d) Scatter plots of mRNA levels of CHOP (left), E2F1 (middle), or E2F7 (right) (as X-axes) versus CRABP2 (as Y-axis) in lung tumors and normal lungs using data from Hou lung (n=156). The correlation of expression between CRABP2 and CHOP (Spearman  $r = 0.3109$ ,  $p < 0.0001$ ), E2F1 (Spearman  $r = 0.4796$ ,  $p < 0.0001$ ), or E2F7 (Spearman  $r = 0.5886$ ,  $p < 0.0001$ ) was analyzed by Spearman's correlation test.

**Figure S6.** Overexpression of Crabp2 promoted proliferation of C10F4 cells. (a) C10F4 cells expressing empty vector (Vector) or Crabp2 were plated onto a 96-well plate at a density of 1,000 cells/well. Cell abundance was detected at 1-4 days by MTS assay. (b) C10F4 cells expressing empty vector (Vector) or Crabp2 were plated onto a 6-well plate at a density of  $4 \times 10^5$  cells/well. Cell abundance was detected at 1-3 days by trypan blue exclusion assay using TC20 automated cell counter. The  $p$  values were determined using Student's t test \* $p < 0.05$ , \*\* $p < 0.01$ .

**Table S1. Correlation of CRABP2 expression levels with clinicopathologic features of lung tumors.**

| HLRT <sup>a</sup>       | n   | CRABP2 expression |      | <i>p</i>            |
|-------------------------|-----|-------------------|------|---------------------|
|                         |     | Low               | High |                     |
| <b>Gender</b>           |     |                   |      |                     |
| Female                  | 45  | 27                | 18   | 0.1310 <sup>b</sup> |
| Male                    | 74  | 33                | 41   |                     |
| <b>Age</b>              |     |                   |      |                     |
| ≤70                     | 73  | 40                | 33   | 0.2617 <sup>b</sup> |
| >70                     | 47  | 20                | 27   |                     |
| <b>Lung Cancer Type</b> |     |                   |      |                     |
| NSCLC                   | 115 | 55                | 60   | 0.0573 <sup>b</sup> |
| SCLC                    | 5   | 5                 | 0    |                     |
| <b>NSCLC Subtype</b>    |     |                   |      |                     |
| Adenocarcinoma          | 48  | 24                | 24   | 0.6052 <sup>c</sup> |
| Squamous cell carcinoma | 40  | 16                | 24   |                     |
| Large cell carcinoma    | 10  | 6                 | 4    |                     |
| Non-small cell          | 17  | 9                 | 8    |                     |
| <b>Stage</b>            |     |                   |      |                     |
| I                       | 43  | 24                | 19   | 0.5334 <sup>c</sup> |
| II                      | 37  | 16                | 21   |                     |
| III-IV                  | 40  | 20                | 20   |                     |

CRABP2 levels in tumor samples (n=120) were detected by real-time PCR. Patients in individual clinical factors were stratified according to low and high CRABP2 levels based on the median value. NSCLC: non-small cell lung cancer; SCLC: small cell lung cancer. <sup>a</sup>HLRT: human lung cancer cDNA array. <sup>b</sup>Fisher's exact test was used to calculate *p* values. <sup>c</sup> $\chi^2$  test was used to calculate *p* values.

**Table S2. Multivariate survival analysis of CRABP2 in lung cancer.**

|           | Overall survival <sup>a</sup> |                  | First progression <sup>b</sup> |                  |
|-----------|-------------------------------|------------------|--------------------------------|------------------|
|           | <i>p</i> value                | HR (95% CI)      | <i>p</i> value                 | HR (95% CI)      |
| Histology | <0.0001                       | 1.44 (1.22-1.7)  | 0.7332                         | 0.93 (0.63-1.39) |
| Stage     | <0.0001                       | 1.52 (1.33-1.73) | <0.0001                        | 2.21 (1.71-2.86) |
| Gender    | 0.0036                        | 1.37 (1.11-1.68) | 0.0725                         | 1.35 (0.97-1.88) |
| CRABP2    | 0.0306                        | 1.31 (1.03-1.67) | 0.0074                         | 1.71 (1.15-2.54) |

<sup>a</sup>Multi-variate analysis (Cox regression) of the overall survival of 890 lung cancer patients. <sup>b</sup>Multi-variate analysis (Cox regression) of the first progression after surgery of 469 lung cancer patients. The optimal cutoff, *p* values and hazard ratio (HR) were provided by Kaplan-Meier Plotter database.

**Table S3. Multivariate survival analysis of ERCC1 in lung cancer.**

|           | Overall survival <sup>a</sup> |                  | First progression <sup>b</sup> |                  |
|-----------|-------------------------------|------------------|--------------------------------|------------------|
|           | <i>p</i> value                | HR (95% CI)      | <i>p</i> value                 | HR (95% CI)      |
| Histology | 0.0001                        | 1.4 (1.19-1.65)  | 0.6234                         | 0.9 (0.61-1.35)  |
| Stage     | <0.0001                       | 1.56 (1.36-1.78) | <0.0001                        | 2.27 (1.75-2.94) |
| Gender    | 0.0086                        | 1.32 (1.07-1.63) | 0.1297                         | 1.29 (0.93-1.79) |
| ERCC1     | 0.001                         | 1.41 (1.15-1.74) | 0.3838                         | 0.85 (0.59-1.22) |

<sup>a</sup>Multi-variate analysis (Cox regression) of the overall survival of 890 lung cancer patients. <sup>b</sup>Multi-variate analysis (Cox regression) of the first progression after surgery of 469 lung cancer patients. The optimal cutoff, *p* values and hazard ratio (HR) were provided by Kaplan-Meier Plotter database.

**Table S4. Multivariate survival analysis of p27 in lung cancer.**

|           | Overall survival <sup>a</sup> |                  | First progression <sup>b</sup> |                  |
|-----------|-------------------------------|------------------|--------------------------------|------------------|
|           | <i>p</i> value                | HR (95% CI)      | <i>p</i> value                 | HR (95% CI)      |
| Histology | 0.0004                        | 1.35 (1.15-1.6)  | 0.8263                         | 0.96 (0.64-1.43) |
| Stage     | <0.0001                       | 1.52 (1.34-1.74) | <0.0001                        | 2.29 (1.78-2.96) |
| Gender    | 0.0056                        | 1.35 (1.09-1.66) | 0.1509                         | 1.27 (0.92-1.77) |
| p27       | <0.0001                       | 1.64 (1.3-2.07)  | 0.1606                         | 0.79 (0.57-1.1)  |

<sup>a</sup>Multi-variate analysis (Cox regression) of the overall survival of 890 lung cancer patients. <sup>b</sup>Multi-variate analysis (Cox regression) of the first progression after surgery of 469 lung cancer patients. The optimal cutoff, *p* values and hazard ratio (HR) were provided by Kaplan-Meier Plotter database.

**Table S5. Multivariate survival analysis of RRM1 in lung cancer.**

|           | Overall survival <sup>a</sup> |                  | First progression <sup>b</sup> |                  |
|-----------|-------------------------------|------------------|--------------------------------|------------------|
|           | <i>p</i> value                | HR (95% CI)      | <i>p</i> value                 | HR (95% CI)      |
| Histology | <0.0001                       | 1.52 (1.29-1.8)  | 0.3598                         | 0.83 (0.55-1.24) |
| Stage     | <0.0001                       | 1.56 (1.36-1.78) | <0.0001                        | 2.2 (1.68-2.87)  |
| Gender    | 0.0074                        | 1.33 (1.08-1.64) | 0.1359                         | 1.28 (0.92-1.78) |
| RRM1      | 0.0001                        | 0.63 (0.5-0.79)  | 0.0194                         | 1.53 (1.07-2.18) |

<sup>a</sup>Multi-variate analysis (Cox regression) of the overall survival of 890 lung cancer patients. <sup>b</sup>Multi-variate analysis (Cox regression) of the first progression after surgery of 469 lung cancer patients. The optimal cutoff, *p* values and hazard ratio (HR) were provided by Kaplan-Meier Plotter database.



**Table S6. The list of primers and oligomers used in this study.**

| <b>Oligomers</b>                                   | <b>Sequences</b>                                                                                                       |
|----------------------------------------------------|------------------------------------------------------------------------------------------------------------------------|
| 18S rRNA primers with Taqman probes <sup>*,a</sup> | Forward: 5'-GCATGGCCGTTCTTAGTTGG-3'<br>Reverse: 5'-TGCCAGAGTCTCGTTCGTTA-3'<br>Probe: 5'-TGGAGCGATTTGTCTGGTTAATTCCGA-3' |
| GFP primers with Taqman probes*                    | Forward: 5'-ACTACCTGAGCACCCAGTCC-3'<br>Reverse: 5'-CTTGTACAGCTCGTCCATGC-3'<br>Probe: 5'-CCCAACGAGAAGCGCGATCA-3'        |
| 18S rRNA                                           | Forward: 5'-GTAACCCGTTGAACCCATT-3'<br>Reverse: 5'-CCATCCAATCGGTAGTAGCG-3'                                              |
| Mouse Crabp2                                       | Forward: 5'-ATGCCTAACTTTTCTGGCAACT-3'<br>Reverse: 5'-CCTGTTTGATCTCGACTGCTG-3'                                          |
| Mouse HuR                                          | Forward: 5'-CATCCCTACCACCCAACACC-3'<br>Reverse: 5'-CCAGACAGTGGAGACCACAC-3'                                             |
| Mouse ITGB1 (integrin $\beta$ 1)                   | Forward: 5'-TAGACATGTGGGGAGTGGGT-3'<br>Reverse: 5'-AGTTCTCCAGCATCTAGTAGCC-3'                                           |
| Human CRABP2                                       | Forward: 5'-GATGCCTCTTGCAGGGTCTT-3'<br>Reverse: 5'-GTGAACCCGGAATGGGTGAT-3'                                             |
| Control shRNA (RFP, TRCN0000072203)                | 5'-<br>CCGGCGCGTGATGAACTTCGAGGACCTCGAGGTCCTCGA<br>AGTTCATCACGCGTTTTTTG-3'                                              |
| Mouse Crabp2 shRNA (TRCN0000105235)                | 5'-<br>CCGGCCACGTCCATCTTACAACTACTCGAGTAGTTTGTA<br>AGATGGACGTGGTTTTTTG-3'                                               |
| Mouse HuR shRNA (TRCN0000308993)                   | 5'-<br>CCGGCATTGGGAGAACGAATTTAATCTCGAGATTAAATTC<br>GTTCTCCCAATGTTTTTTG-3'                                              |

|                                    |                                                                               |
|------------------------------------|-------------------------------------------------------------------------------|
| Control siRNA                      | Sense: 5'-UUCUCCGAACGUGUCACGUTT-3'<br>Anti-sense: 3'-TTAAGAGGCUUGCACAGUGCA-5' |
| Human CRABP2 siRNA                 | Sense: 5'-CGGAAAACUUCGAGGAAUU-3'<br>Anti-sense: 3'-TTGCCUUUUGAAGCUCCUUA-5'    |
| Mouse HuR siRNA (A)                | Sense: 5'-GGAGAACGAAUUUAAUUGUTT-3'<br>Anti-sense: 3'-TTCCUCUUGCUUAAAUAACA-5'  |
| Mouse HuR siRNA (B)                | Sense: 5'-GCUGGUGCAUCUUCAUCUATT-3'<br>Anti-sense: 3'-TTCGACCACGUAGAAGUAGAU-5' |
| Mouse HuR siRNA (C)                | Sense: 5'-GACCAUGACAAACUAUGAATT-3'<br>Anti-sense: 3'-TTCUGGUACUGUUUGAUACUU-5' |
| Mouse Integrin $\beta$ 1 siRNA (A) | Sense: 5'-GGCUCUCAACUAUAAAGATT-3'<br>Anti-sense: 3'-TTCCGAGAGUUUGAUUUUCU-5'   |
| Mouse Integrin $\beta$ 1 siRNA (B) | Sense: 5'-GGGCUGAAGAUUACCCUAUTT-3'<br>Anti-sense: 3'-TTCCCGACUUCUAAUGGGAUA-5' |
| Mouse Integrin $\beta$ 1 siRNA (C) | Sense: 5'-GCGAGUGUGAUAACUUCAATT-3'<br>Anti-sense: 3'-TTCGCUCACACUAUUGAAGUU-5' |

\*: used for detection of GFP+ cells in mouse tissues. <sup>a</sup>: used for real-time PCR of blood buffy coat samples.

**Table S7. Information of antibodies and reagents used in this study.**

|                                       |                         |
|---------------------------------------|-------------------------|
| <b>Western blot antibodies</b>        |                         |
| $\beta$ -actin                        | Genetex, GTX109639      |
| CRABP2                                | Genetex, GTX101551      |
| HuR                                   | Cell signaling, 12582   |
| Integrin $\beta$ 1                    | Santa cruz, sc-6622     |
| pERK (T202/Y204)                      | Cell signaling, 9101    |
| ERK                                   | Cell signaling, 9102    |
| pFAK (Y397)                           | Genetex, GTX61795       |
| FAK                                   | Millipore, 05-537       |
| <b>Immunoprecipitation antibodies</b> |                         |
| CRABP2                                | Proteintech, 10225-1-AP |
| <b>IHC antibodies</b>                 |                         |
| CRABP2                                | Genetex, GTX101551      |
| CHOP                                  | Genetex, GTX11419       |
| <b>Chemicals</b>                      |                         |
| Tunicamycin                           | Sigma, T7765            |
| Gemcitabine                           | Sigma, G6423            |
| Erlotinib                             | Selleckchem, S7786      |
| Irinotecan                            | Selleckchem, S2217      |
| Retinoic acid                         | Sigma, R2625            |
| ERK inhibitor FR180204                | Sigma, SML0320          |

|                  |                |
|------------------|----------------|
| FAK inhibitor 14 | Sigma, SML0837 |
|------------------|----------------|

# Figure S1

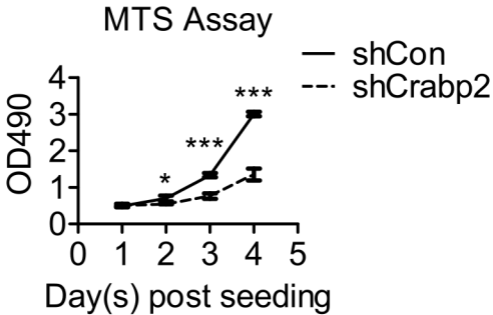

**Figure S2**

## Anoikis assay

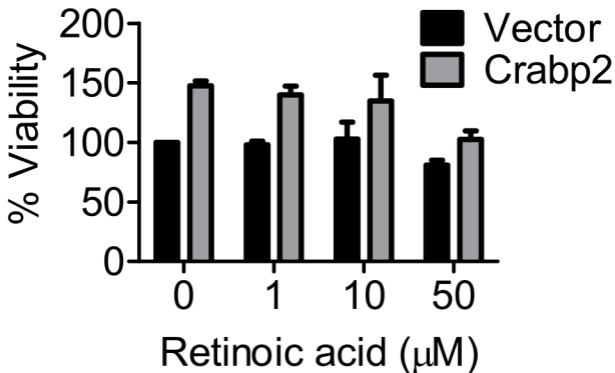

| Source of Variation   | <i>p</i> value |
|-----------------------|----------------|
| Crabp2 overexpression | <0.0001        |
| Retinoic acid         | 0.0002         |
| Interaction           | 0.1677         |

**Figure S3**

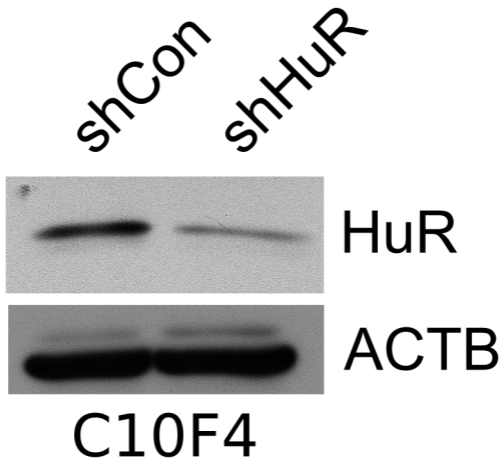

**Figure S4**

**a**

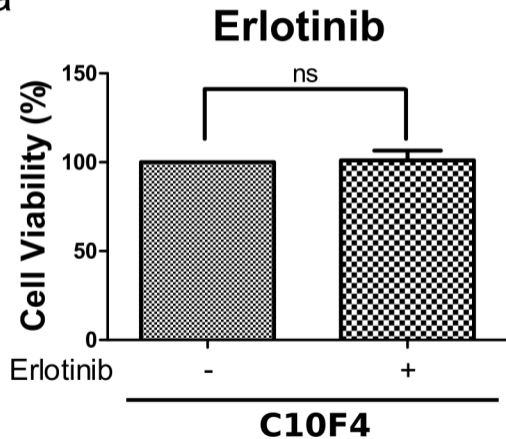

**b**

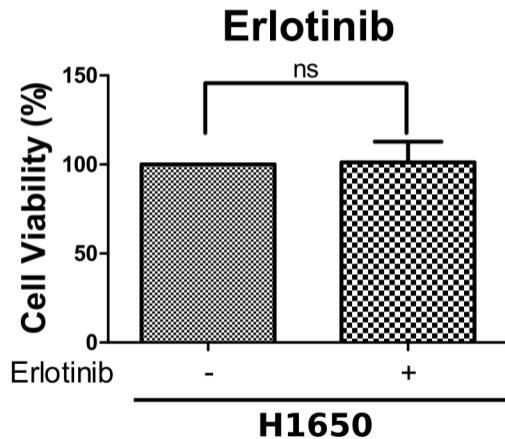



a

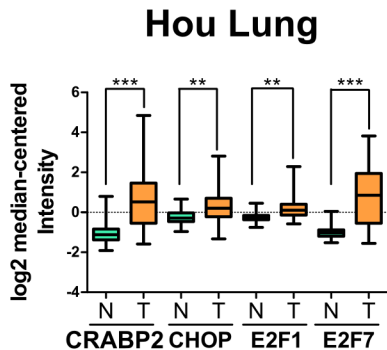

b

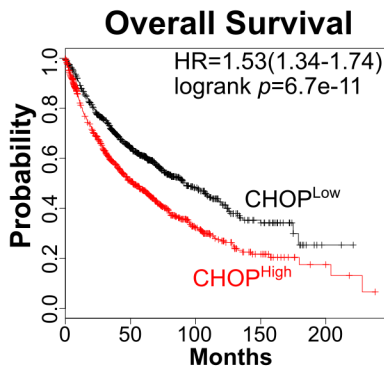

c

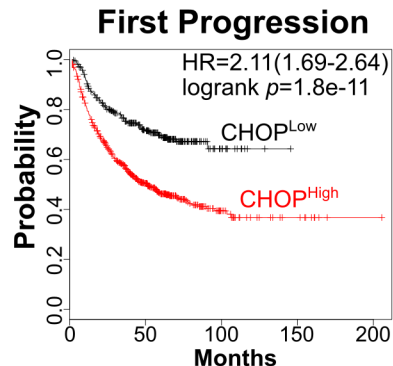

d

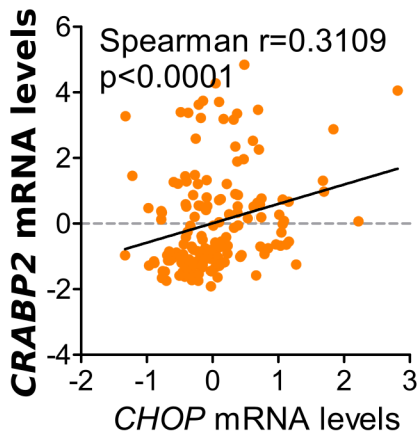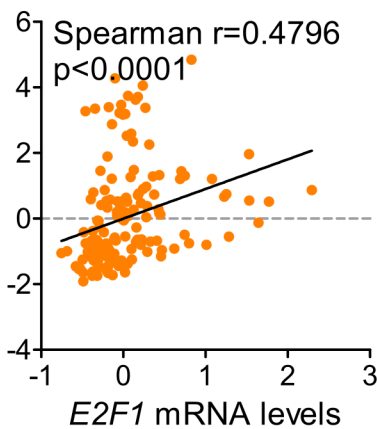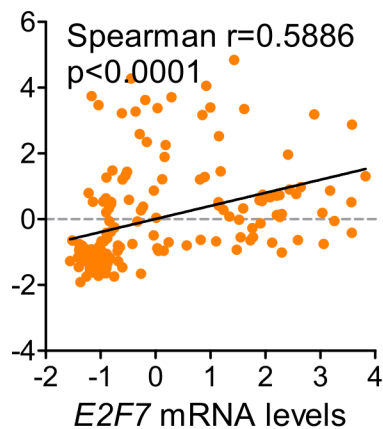

**Cell Stress Markers**

**Figure S6**

**a**

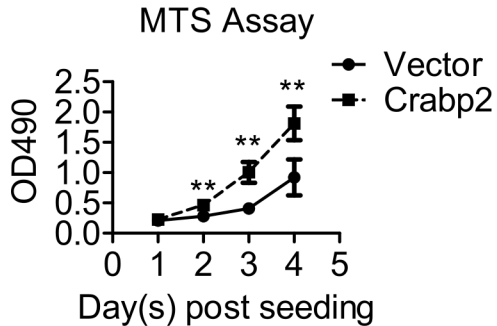

**b**

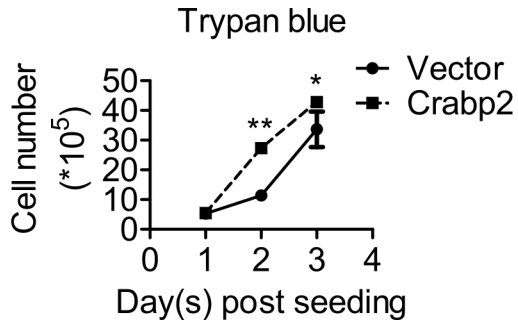

# Figure 1g

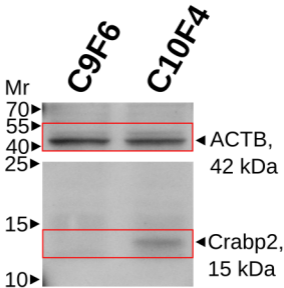

# Figure 3a

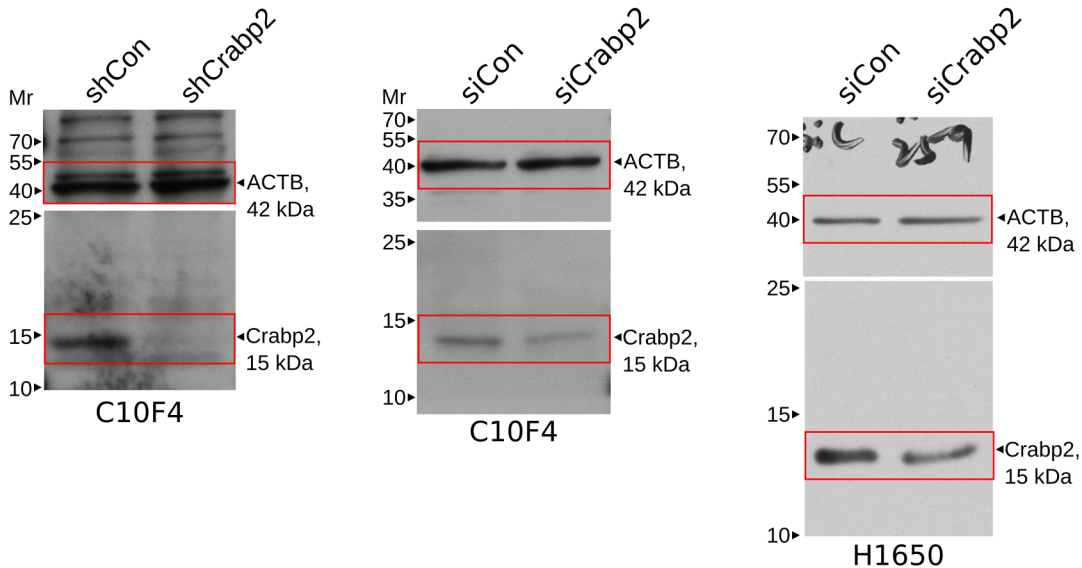

# Figure 4a

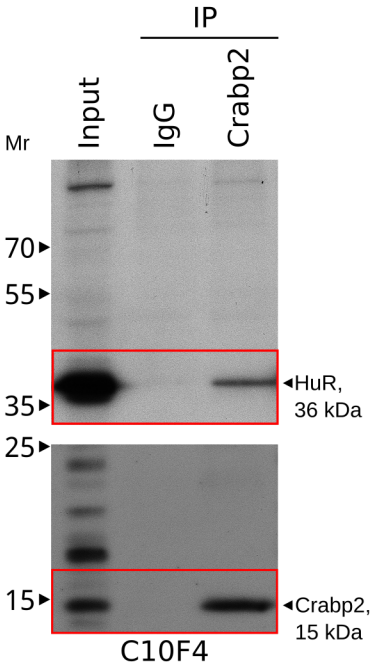

# Figure 4f

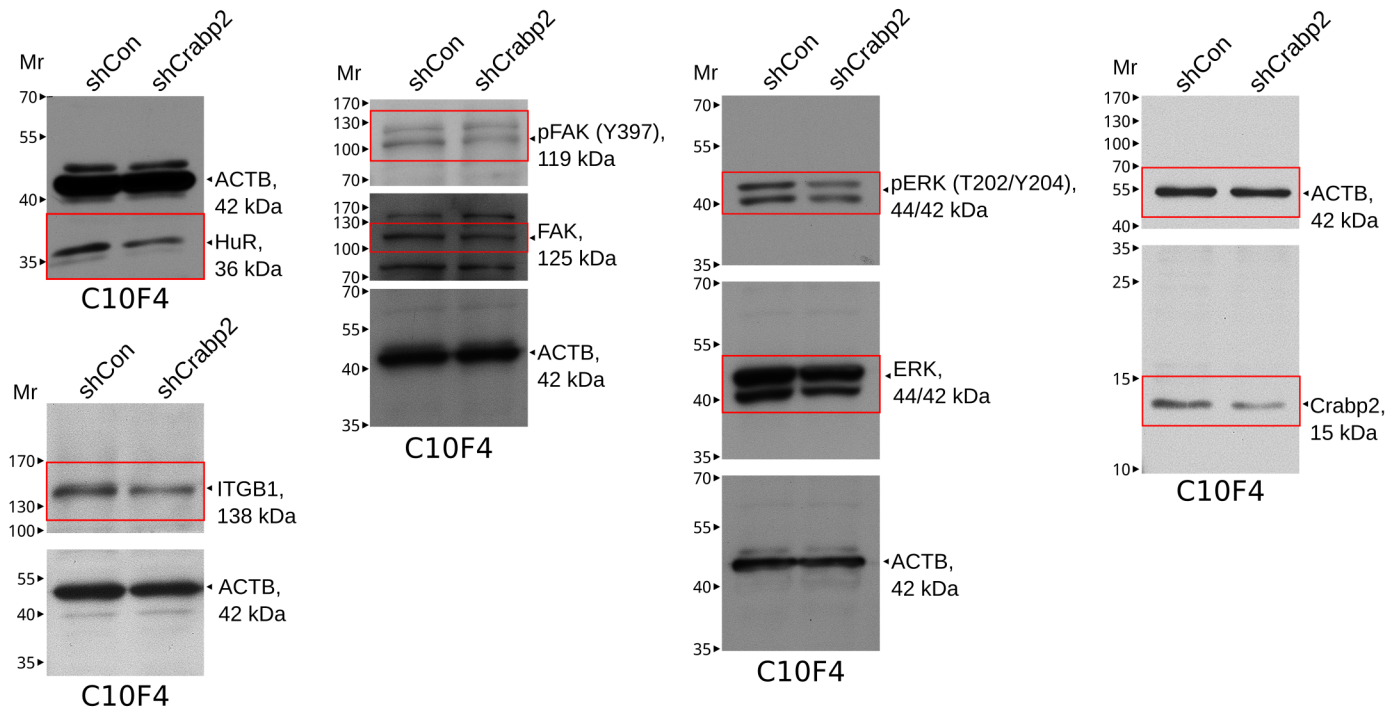

# Figure 4g

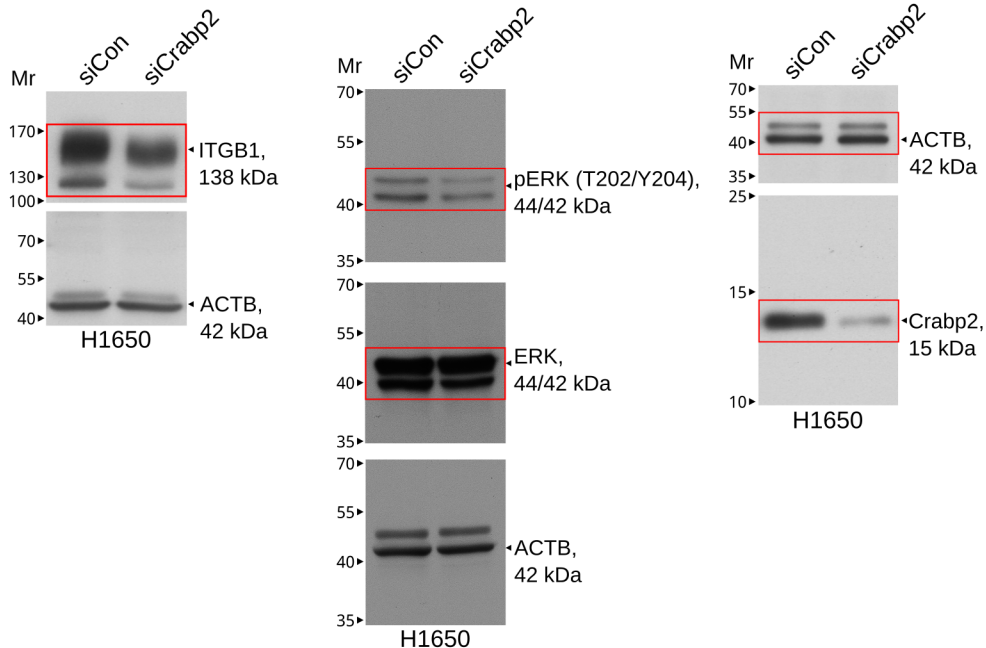

# Figure 4h

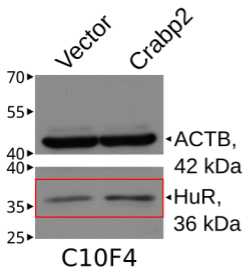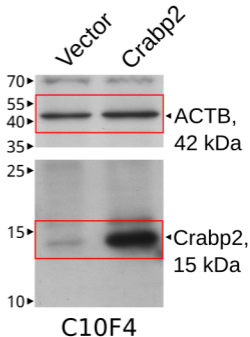



# Figure 4i

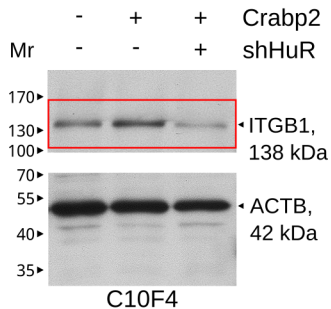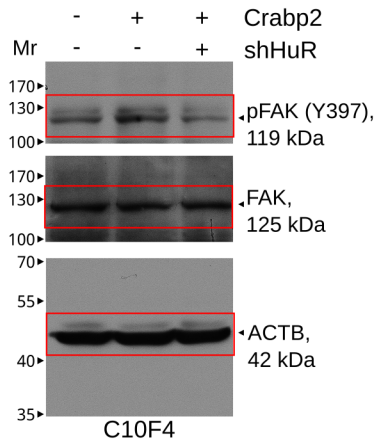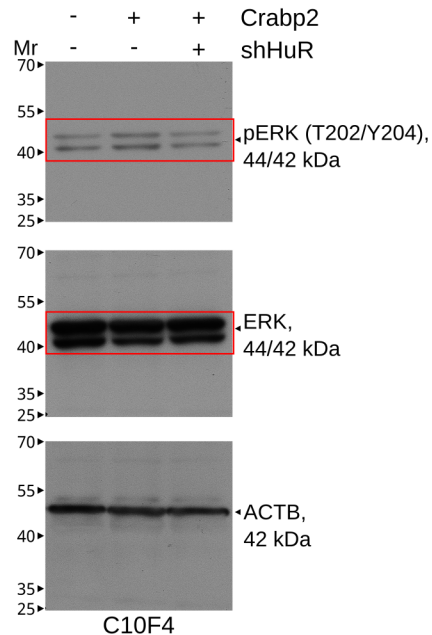

# Figure 5a-b

a

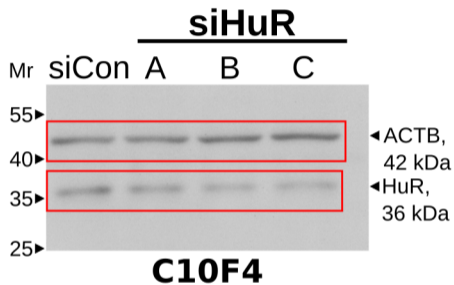

b

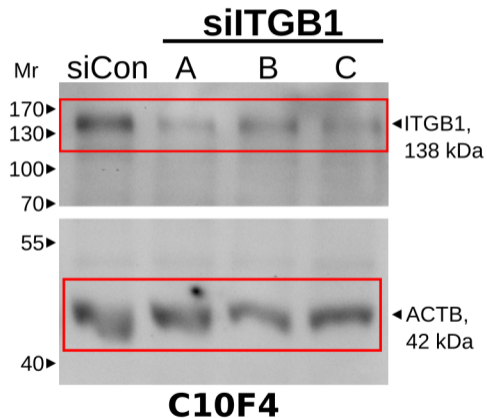

# Figure 7b

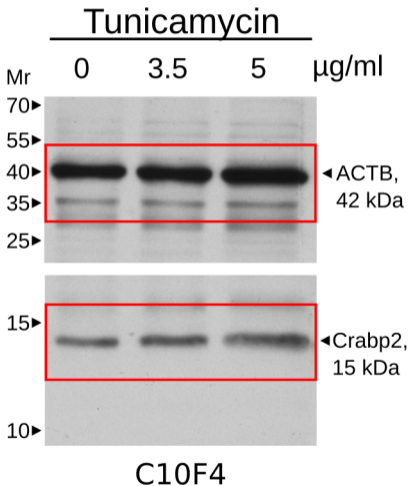

# Figure S3

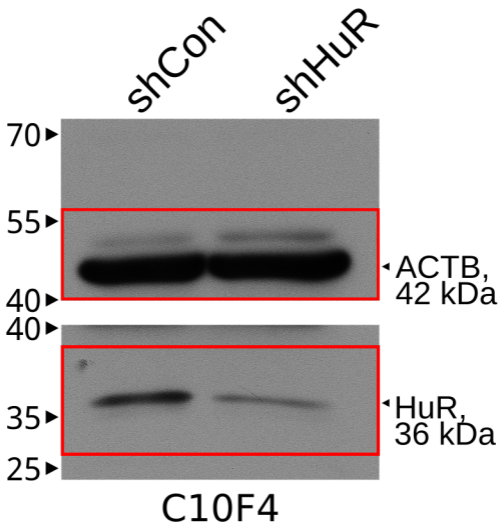

Supplement: 41598_2018_37443_MOESM1_ESM.pdf [file 41598_2018_37443_MOESM1_ESM.pdf]
